# Supplementary material
Source: publisher figshare collection journal article supplement (https://karger.figshare.com/ndownloader/files/27670956)
Supplement: Supplementary file 1 [file 27670956]

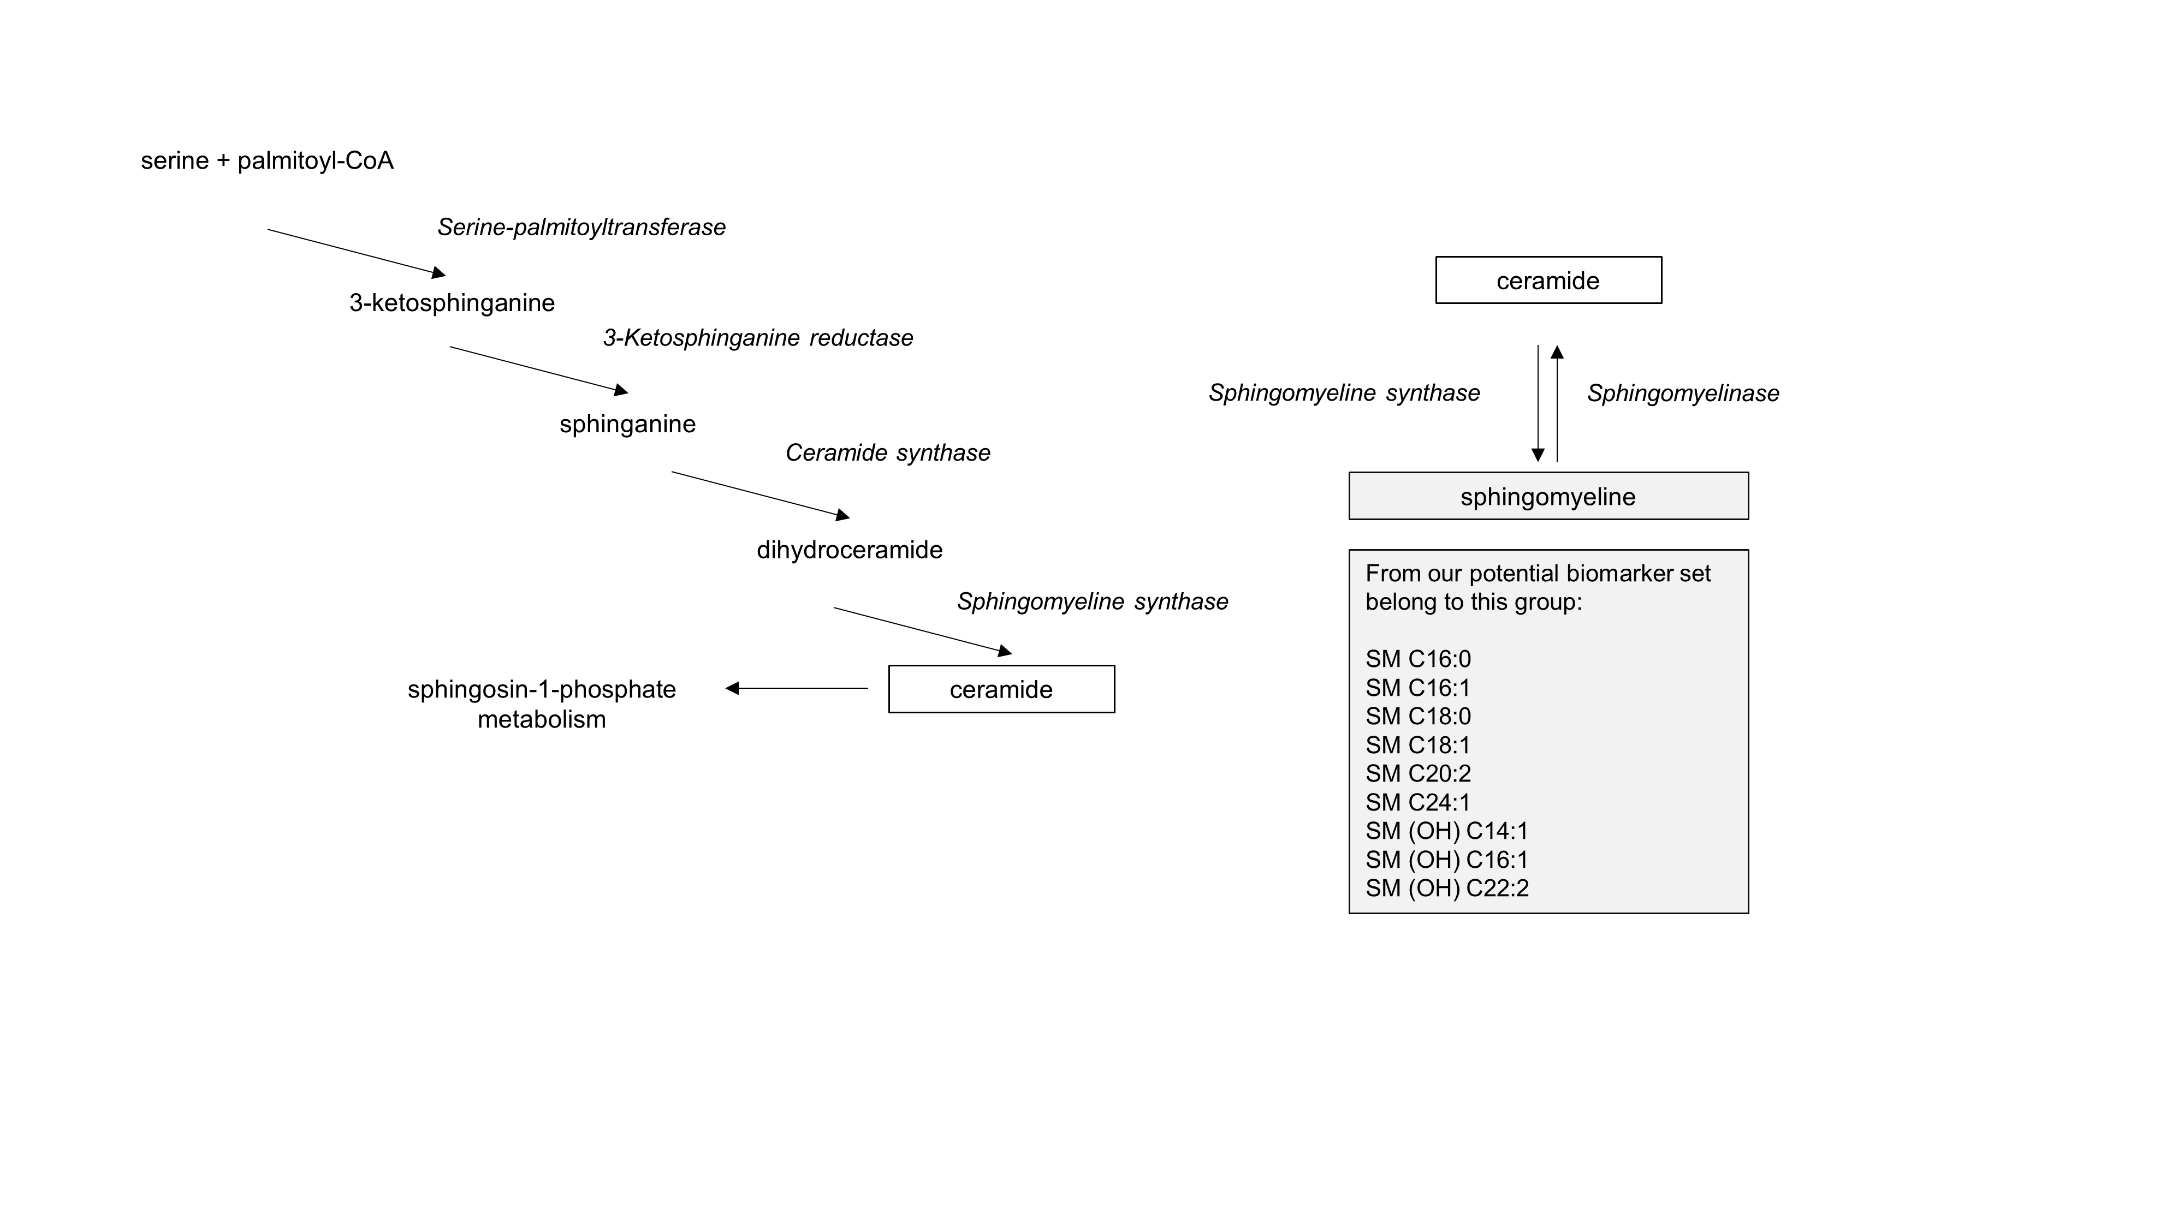
**Fig. S4**: Overview of sphingolipid metabolism. Pathways are shown in a schematic way including molecules and enzymes involved according to [1-2]. Ceramide has central role and can be produced de novo from serine and palmitoyl-CoA. Alternatively, it can be produced from sphingomyeline or sphingosine + free fatty acid. Sphingolipid species included in our potential biomarker set for detection alcoholic liver cirrhosis are shown.

References:

1. Merrill AH, Jr. Sphingolipid and glycosphingolipid metabolic pathways in the era of sphingolipidomics. Chem Rev2011;111:6387-6422.
2. Ogretmen B. Sphingolipid metabolism in cancer signalling and therapy. Nat Rev Cancer2018;18:33-50.
